# Supplementary material for: Rapid detection of Mycobacterium ulcerans with isothermal recombinase polymerase amplification assay
Source: PubMed Central journal article supplement (PMC6373974; doi:10.1371/journal.pntd.0007155), 2019-02-01
Supplement: pntd.0007155.s001.pdf [file pntd.0007155.s001.pdf]

IS2404 nucleotide 96108-97471 reverse strand

1 cagggctccg gcgttggtga ttagcaggct tgtgagctgg ggaattgtgg attgaggagg  
61 tctagggcggc ggttggcggt caaagcgggt atccggcagg cgtcggcgat gttgtcggcg  
121 ccgttgagge ggtgcagatt gatcgcgggt ttgcgtagcg ttgctaggac ctgtgcgccg  
181 tttccggtat gtgccctgtg acggtcttcg tcgaaggtga cgtcgcgtat ccagtgcagg  
241 ctgttctcga ttccccagtg ttgacgcata caggatcatga tcgcggtagg gcgggcgtgc  
301 tcgaacggca ggctgcagat ggcatagacc acctccacgc tgcgctggtc ggtggcggtg  
361 atcaagcggt cagcagtgat ccggatgatt tgttttgcgt aggggaagcc gattcctcgt  
421 gcagcgggtga tgatttgcag ggtgcgggtc tcgacacggc cgtggccggc ggagtcgtcg  
481 gtagcggctg cgggcacctc ggcccagggc agcgcgggtga tacgggcaag tattttggct  
541 tggttggact tgacgatcat caggtagtgc gacttcaagg tggcgcagat caacttcgcg  
601 gtgacgacct gggatgcatcgatccacaggtggtgaccagccaccgcaagct acccggcagc  
661 agcgtgagca gggcacgtac gcaggaatt tcattgcttt tctcggcgac agcgagttga  
721 ccgagcacca atcgggcacg gtaggggaac accgacacga gatgcgtggc tctcgtttg  
781 gcgcgtaag caccacgcag catcttgcg tccaacgga tcggcacca tccactgggg  
841 tcgctgctgg ccacgtgtgc agtgaagtaa ctgccatcc tggcgttgag gtcggcgggg  
901 tctagccgag acaaaacagc gcggaaggtc ttctcactgg gccgccgga ccggaccct  
961 aattgggcca acacatcacc ggaagcgggt gccgccatg tggcaaaacc agcatagccg  
1021 cgcacccccg cggcagtggt cagaaccggt atcgccaaca aagccatcag cgaatacctc  
1081 cgaccgcgtg ggtccctcgg gtctggcacc gaggccaaca catcgagaaa ctccgatccg  
1141 atgagctcgc tgcgctcacc agcactccag cggtcgaaca cctctggaac cgacgacaca  
1201 ggcaatactg aaacgctagg cacgggcaac tccagaccaa cgacgaacag taaccaactc  
1261 gatcgttctc cagatagccc gtgcctacac tccggcccc aatagcgggc accaaagatc  
1321 atcaaccag ctcaaacgct tgctaataca caacgccgga gcc
